# Supplementary material for: A flexible composite solid electrolyte with a highly stable interphase for dendrite-free and durable all-solid-state lithium metal batteries
Source: Royal Society of Chemistry journal article supplement (doi:10.1039/d0ta06697d), 2020-01-01
Supplement: d0ta06697d1.pdf [file d0ta06697d1.pdf]

## Supporting Information

### **Flexible composite solid electrolyte with high stable interphase for dendrite-free and durable all-solid-state lithium metal batteries**

Dechao Zhang, Xijun Xu, Xinyue Huang, Zhicong Shi, Zhuosen Wang,

Zhengbo Liu, Renzong Hu, Jun Liu,\* and Min Zhu

D. Zhang, X. Xu, Z. Wang, Prof. J. Liu, Z. Liu, J. Shen, Prof. M. Zhu

Guangdong Provincial Key Laboratory of Advanced Energy Storage Materials,  
School of Materials Science and Engineering, South China University of Technology,  
Guangzhou, 510641, China

Email: msjliu@scut.edu.cn

X. Huang, Prof. Z. Shi

Guangdong Engineering Technology Research Center for New Energy Materials and  
Devices, School of Materials and Energy, Guangdong University of Technology,  
Guangzhou 510006, China

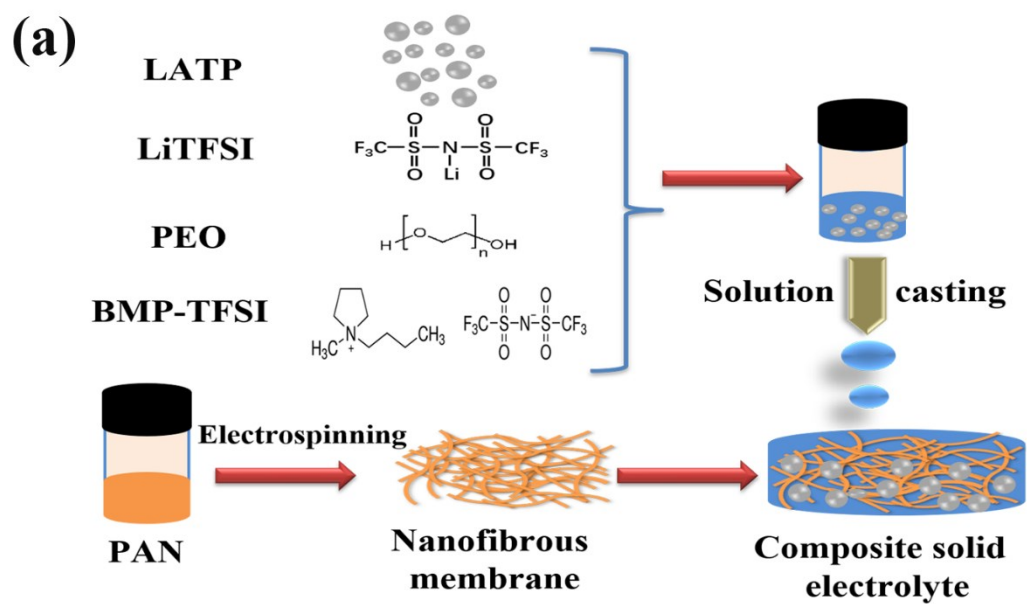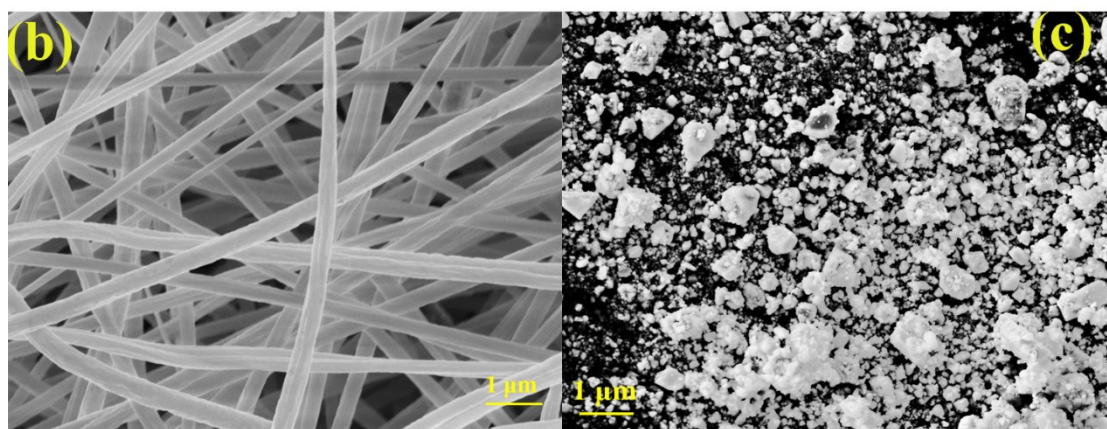

**Figure S1.** (a) Schematic illustration for the schematic illustration of the composite solid electrolyte. Typical SEM images of the electrospun PAN-fibers (b), and LATP powders.

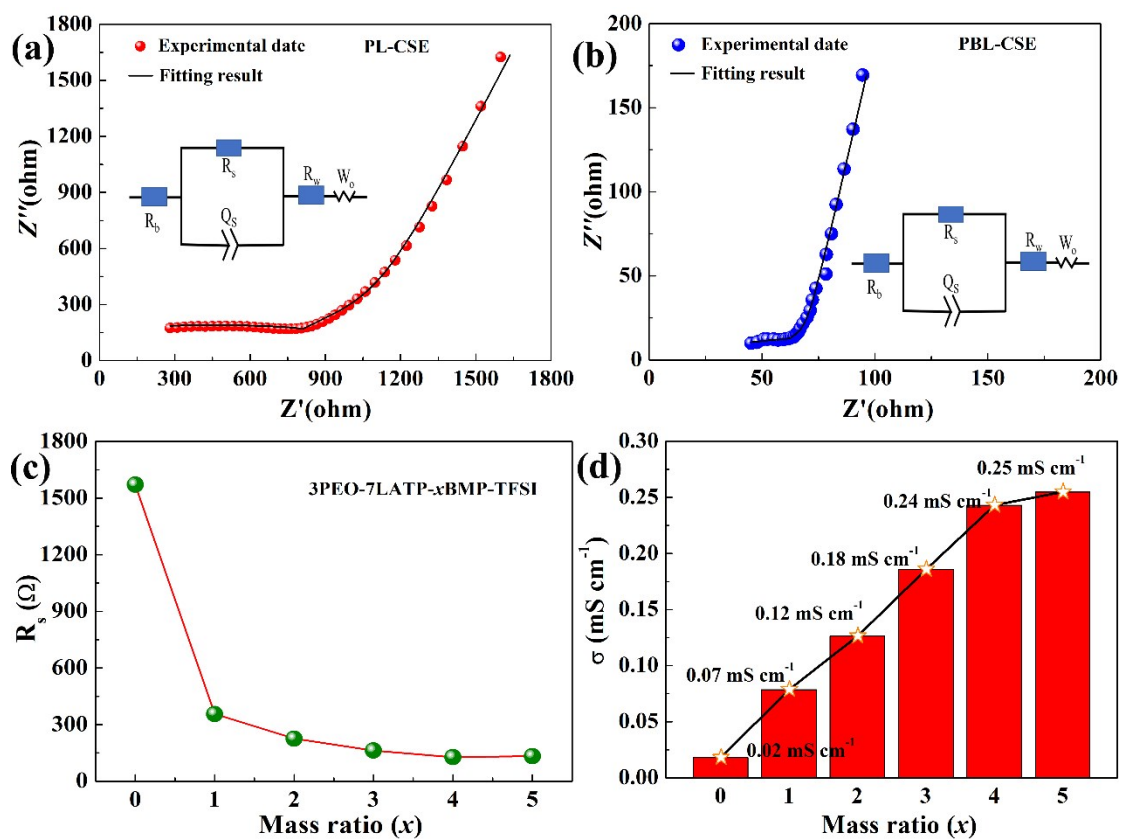

**Figure S2.** (a,b) Selected Nyquist plots of 3PEO-7LATP-xBMP-TFSI composite solid electrolyte: (a) PL-CSE and (b) PBL-CSE, the solid line represents the fitting curve with the equivalent circuit shown in the inset. (c) Interfacial resistance and (d) ionic conductivity for 3PEO-7LATP-xBMP-TFSI composite solid electrolyte incorporated with different concentrations of BMP-TFSI (IL).

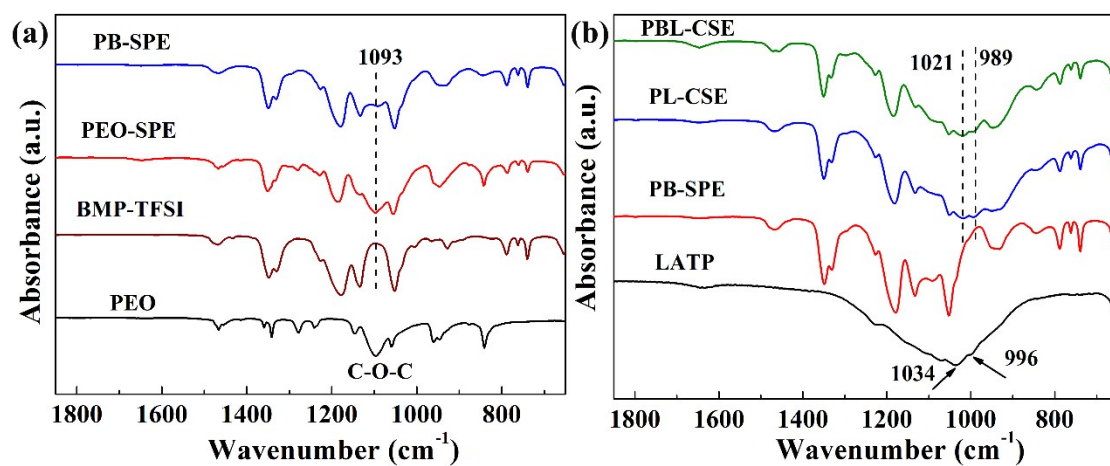

**Figure S3.** FTIR spectra of pure PEO, BMP-TFSI, PEO-SPE and PB-SPE (a) and LATP, PB-SPE, PL-CSE, PBL-CSE (b).

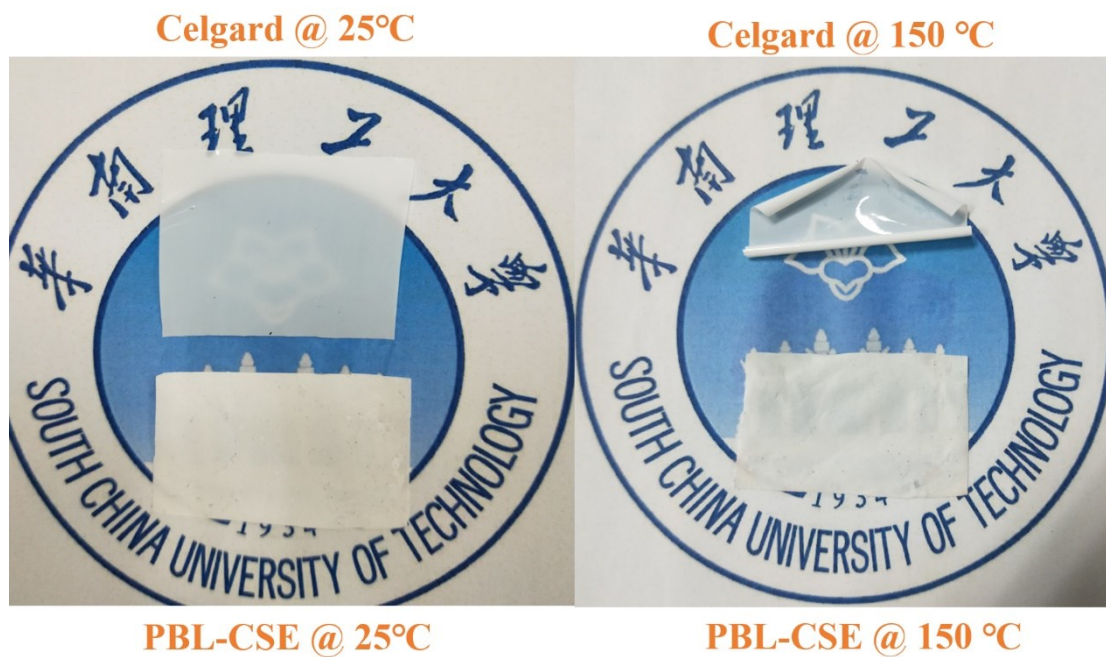

**Figure S4.** Optical photos of Celgard separator and PBL-CSE before and after heating at 150 °C.

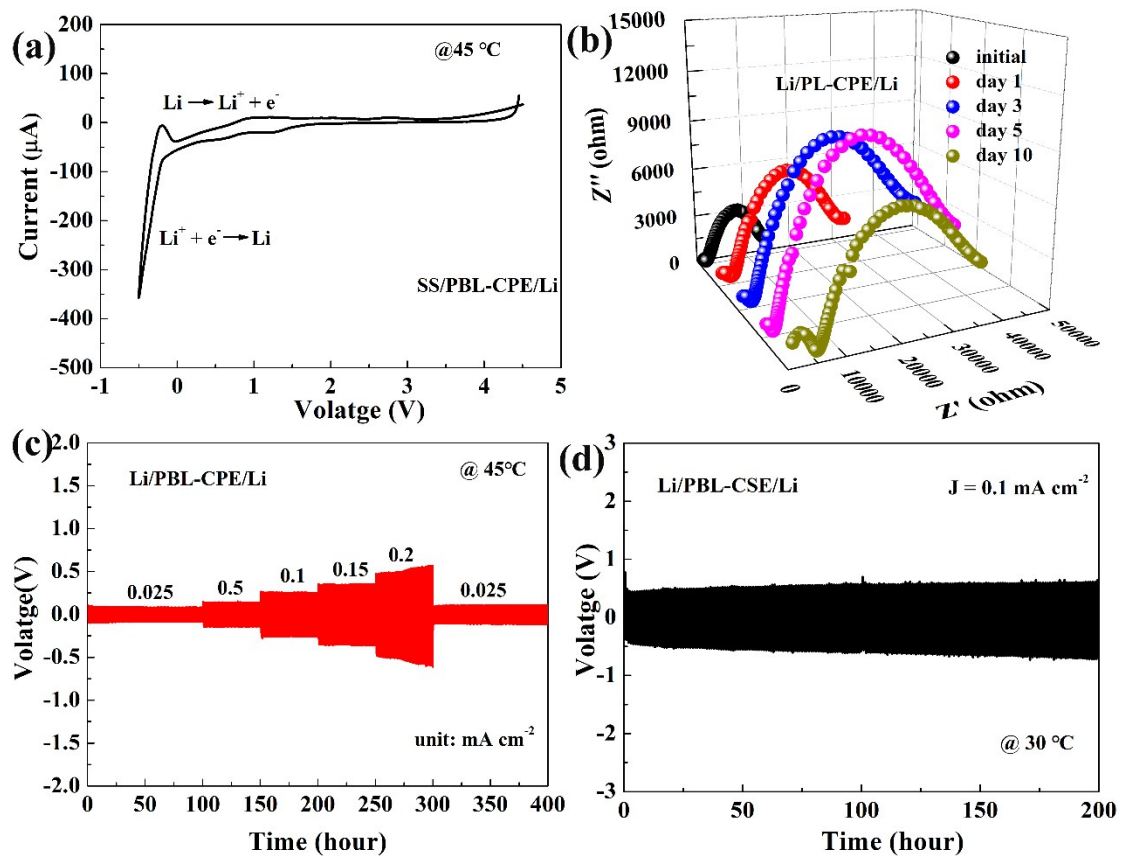

**Figure S5.** (a) CV curves of PBL-CSE at a scan rate of  $1 \text{ mV s}^{-1}$  at  $45 \text{ }^\circ\text{C}$ . (b) The AC impedance spectrum of the Li/PL-CSE/Li cell after different aging time. Galvanostatic cycling of Li/PBL-CSE/Li cell with different current density at  $45 \text{ }^\circ\text{C}$  (c), and with a current density of  $0.1 \text{ mA cm}^{-2}$  at  $30 \text{ }^\circ\text{C}$ .

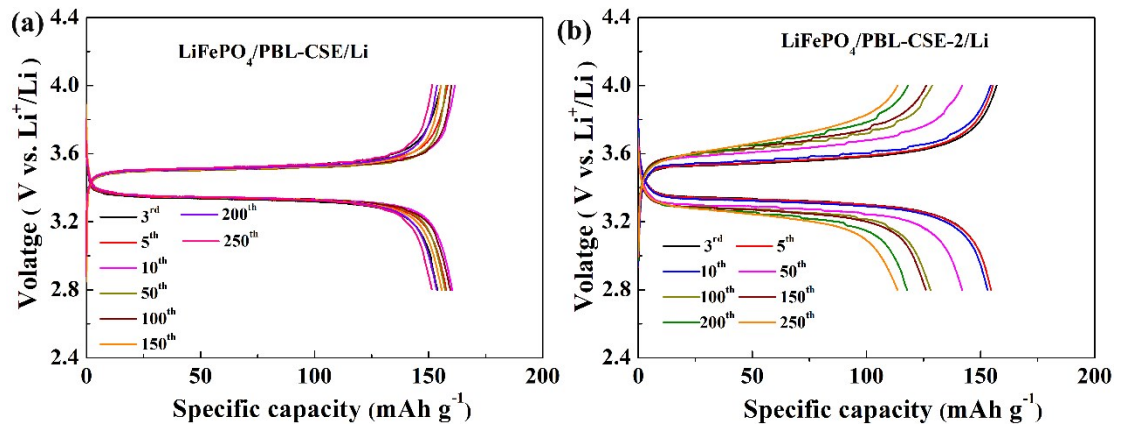

**Figure S6.** Typical charge and discharge voltage profiles of  $\text{LiFePO}_4/\text{PBL-CSE}/\text{Li}$  (a) and  $\text{LiFePO}_4/3\text{PEO-7LATP-2BMP-TFSI}/\text{Li}$  (b) solid-state cells at 0.1C current density and 30 °C.

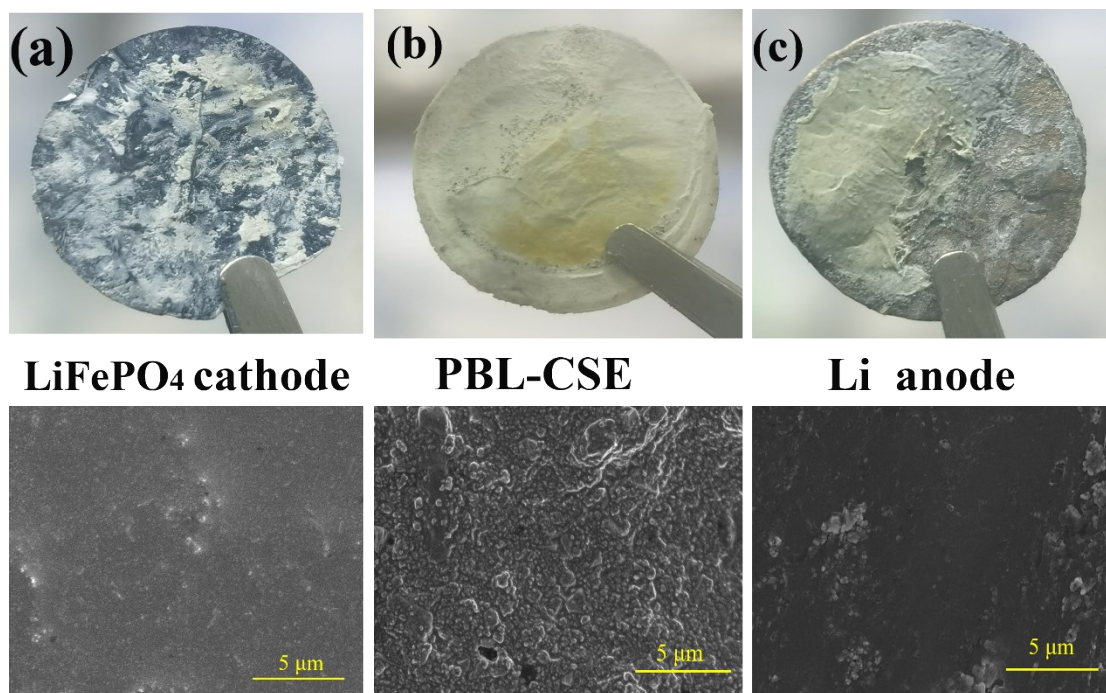

**Figure S7.** Optical photograph and SEM images of LiFePO<sub>4</sub> cathode (a), PBL-CSE composite electrolyte membrane (b) and Li metal anode (c) after 1200 cycles at 45 °C.



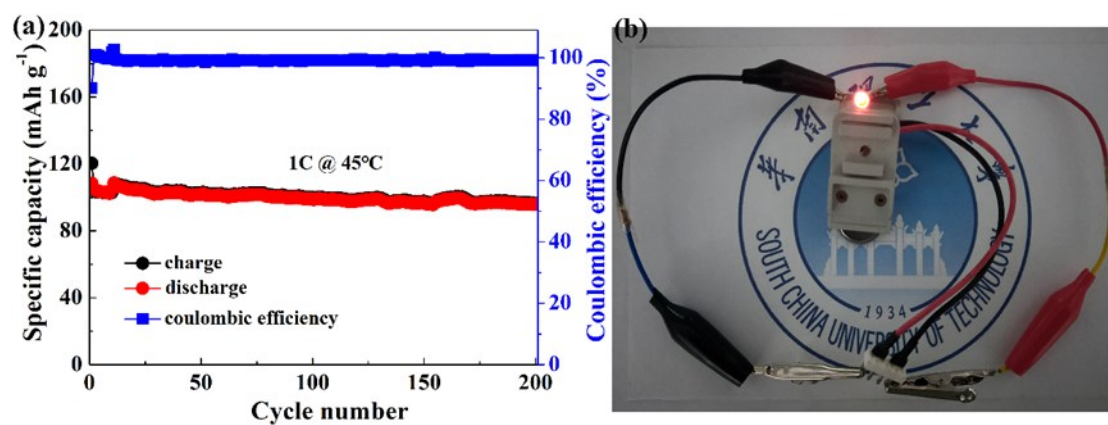

**Figure S8.** (a) Cycling performances of LiFePO<sub>4</sub>/PBL-CSE/Li cell at 1C current density. (b) Illustration of the solid cell light up a LED lamp at room temperature.
